# Supplementary material for: Vital exhaustion in women with chest pain and no obstructive coronary artery disease: the iPOWER study
Source: HighWire-hosted journal article supplement (doi:10.1136/ebmental-2020-300175), 2020-12-11
Supplement: ebmental-2020-300175supp001_data_supplement.pdf [file ebmental-2020-300175supp001_data_supplement.pdf]

**Table 4** Quality and burden of chest pain according to vital exhaustion severity.

|                                                      | Vital Exhaustion Categories |                   |                       |                     | Age-adjusted<br><i>p</i> -value |
|------------------------------------------------------|-----------------------------|-------------------|-----------------------|---------------------|---------------------------------|
|                                                      | Normal<br>(n = 197)         | Mild<br>(n = 458) | Moderate<br>(n = 354) | Severe<br>(n = 257) |                                 |
| Chest pain classification                            |                             |                   |                       |                     |                                 |
| Typical angina                                       | 46 (23)                     | 131 (29)          | 127 (36)              | 98 (38)             | 0.001                           |
| Atypical angina or non-anginal chest pain            | 151 (77)                    | 327 (71)          | 227 (64)              | 159 (62)            |                                 |
| Seattle Angina Questionnaire                         |                             |                   |                       |                     |                                 |
| Exertion scale <sup>1</sup>                          |                             |                   |                       |                     |                                 |
| Total subscale score                                 | 72±14                       | 68±17             | 61±20                 | 57±22               | <0.001                          |
| Angina stability <sup>2</sup>                        |                             |                   |                       |                     |                                 |
| Total subscale score                                 | 76±26                       | 69±27             | 59±27                 | 51±26               | <0.001                          |
| Angina frequency and Nitroglycerine use <sup>3</sup> |                             |                   |                       |                     |                                 |
| Total subscale score                                 | 87±16                       | 83±17             | 75±20                 | 68±21               | <0.001                          |
| Treatment satisfaction <sup>4</sup>                  |                             |                   |                       |                     |                                 |
| Total subscale score                                 | 79±17                       | 75±18             | 68±19                 | 61±21               | <0.001                          |
| Disease perception <sup>5</sup>                      |                             |                   |                       |                     |                                 |
| Total subscale score                                 | 68±16                       | 60±18             | 50±20                 | 39±19               | <0.001                          |

Data presented as n (%) or mean±SD. *P*-values from age-adjusted logistic or linear regression analyses. Seattle Angina Questionnaire score range: 0-100. Lower score implies lower level of functioning<sup>1</sup>, more symptoms<sup>2</sup>, more frequent symptoms<sup>3</sup>, less treatment satisfaction<sup>4</sup>, and worse disease perception<sup>5</sup>.
