# Supplementary figures and images for: Vital exhaustion in women with chest pain and no obstructive coronary artery disease: the iPOWER study
Source: HighWire-hosted journal article supplement (doi:10.1136/ebmental-2020-300175), 2020-12-11

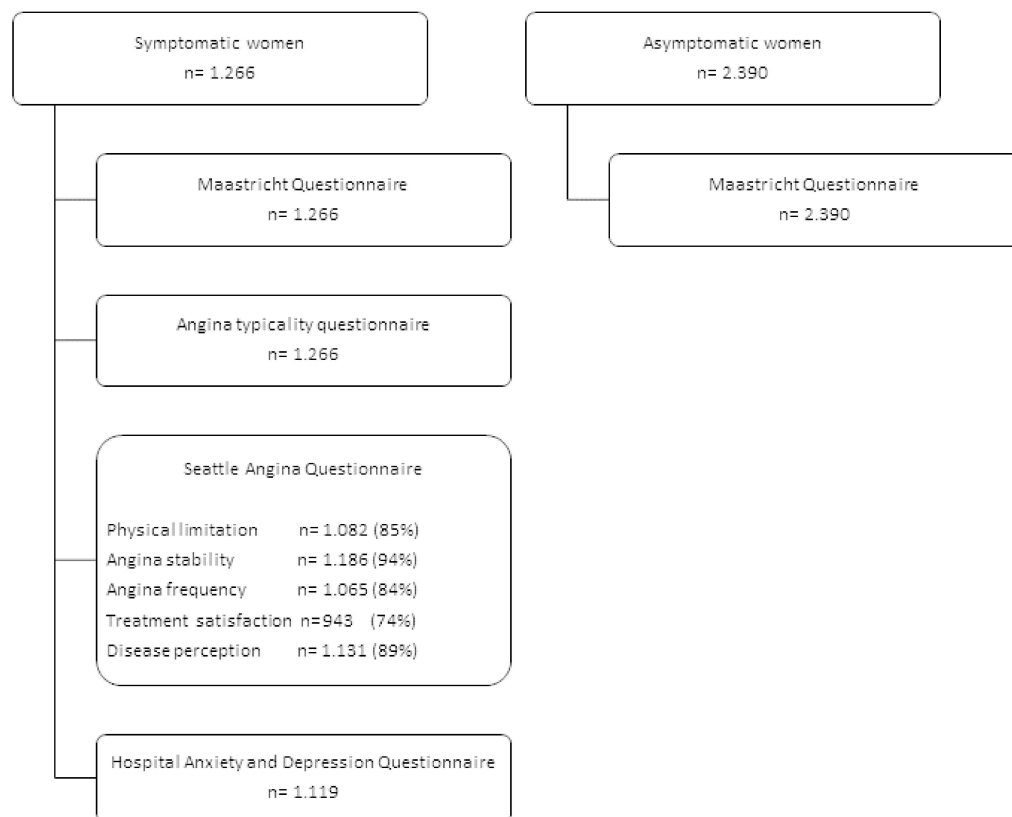

Supplement: ebmental-2020-300175supp003_data_supplement.pdf [file ebmental-2020-300175supp003_data_supplement.pdf]
